# Supplementary material for: Antileukemic Potential ofMomordica charantiaSeed Extracts on Human Myeloid Leukemic HL60 Cells
Source: Hindawi journal article supplement (doi:10.1155/2012/732404), 2012-01-01
Supplement: f1 [file 732404.f1.pdf]

**SUPPLEMENTARY TABLES 1A-1F CORRESPONDING TO FIGURES 1A,1C,1D,2A,2B AND 2D, RESPECTIVELY**

| <b>Table 1A: Effect of different fractions of <i>M. charantia</i> seeds on HL60 cells differentiation on day 5 of the treatment.</b> |             |           |           |             |           |           |             |           |           |
|--------------------------------------------------------------------------------------------------------------------------------------|-------------|-----------|-----------|-------------|-----------|-----------|-------------|-----------|-----------|
| <b>Treatment</b>                                                                                                                     | <b>Mc-1</b> |           |           | <b>Mc-2</b> |           |           | <b>Mc-3</b> |           |           |
| <b>Conc. (µg/ml)</b>                                                                                                                 | <b>5</b>    | <b>10</b> | <b>20</b> | <b>5</b>    | <b>10</b> | <b>20</b> | <b>5</b>    | <b>10</b> | <b>20</b> |
| Total number of cells counted                                                                                                        | 608         | 650       | 638       | 408         | 547       | 534       | 535         | 611       | 628       |
| Number of NBT positive cells                                                                                                         | 162         | 169       | 158       | 154         | 280       | 285       | 25          | 26        | 28        |
| DMSO (1%), a positive inducer resulted in 294 NBT positive cells out of 578 cells counted.                                           |             |           |           |             |           |           |             |           |           |

| <b>Table 1B: Time dependence of Mc-2 induced HL60 cells differentiation</b> |                            |                           |                            |                           |                            |                           |
|-----------------------------------------------------------------------------|----------------------------|---------------------------|----------------------------|---------------------------|----------------------------|---------------------------|
| Days after treatment                                                        | Control                    |                           | Mc-2A (20 mg/ml)           |                           | DMSO (1%)                  |                           |
|                                                                             | Total no. of Counted cells | No. of NBT positive cells | Total no. of Counted cells | No. of NBT positive cells | Total no. of Counted cells | No. of NBT positive cells |
| 1                                                                           | 544                        | 9                         | 542                        | 14                        | 500                        | 26                        |
| 2                                                                           | 548                        | 22                        | 593                        | 40                        | 647                        | 61                        |
| 3                                                                           | 620                        | 40                        | 613                        | 169                       | 580                        | 127                       |
| 4                                                                           | 542                        | 45                        | 566                        | 253                       | 469                        | 248                       |
| 5                                                                           | 528                        | 44                        | 648                        | 258                       | 610                        | 303                       |

| <b>Table 1C: Effect of heat-inactivated Mc-2 (Mc-2H) and protease-treated Mc-2 (Mc-2P) on HL60 cells differentiation</b> |         |                 |                 |                  |
|--------------------------------------------------------------------------------------------------------------------------|---------|-----------------|-----------------|------------------|
| Treatment                                                                                                                | Control | Mc-2 (20 µg/ml) | Mc-2H(20 µg/ml) | Mc-2P (20 µg/ml) |
| Total no. of counted cells                                                                                               | 631     | 634             | 590             | 554              |
| No. of NBT positive cells                                                                                                | 27      | 298             | 247             | 240              |

| <b>Table 1D: Effect of acetone extract of Mc-2 (Mc-2Ac) on HL60 cells differentiation</b> |                     |                           |                           |                           |                           |
|-------------------------------------------------------------------------------------------|---------------------|---------------------------|---------------------------|---------------------------|---------------------------|
| Treatment                                                                                 | Final Conc. (µg/ml) | Day 4                     |                           | Day5                      |                           |
|                                                                                           |                     | Total No.of counted cells | No. of NBT Positive cells | Total No.of counted cells | No. of NBT Positive cells |
| Control                                                                                   | -                   | 444                       | 40                        | 587                       | 72                        |
| Mc-2Ac                                                                                    | 5                   | 586                       | 197                       | 598                       | 262                       |
|                                                                                           | 10                  | 801                       | 340                       | 542                       | 324                       |
|                                                                                           | 20                  | 691                       | 353                       | 706                       | 403                       |

**Table 1E: Time dependence of Mc-2A induced HL60 cells differentiation**

| Days after treatment | Control                    |                           | Mc-2A (20 mg/ml)           |                           | DMSO (1%)                  |                           |
|----------------------|----------------------------|---------------------------|----------------------------|---------------------------|----------------------------|---------------------------|
|                      | Total no. of Counted cells | No. of NBT positive cells | Total no. of Counted cells | No. of NBT positive cells | Total no. of Counted cells | No. of NBT positive cells |
| 1                    | 579                        | 9                         | 626                        | 34                        | 615                        | 35                        |
| 2                    | 628                        | 15                        | 583                        | 100                       | 612                        | 57                        |
| 3                    | 652                        | 45                        | 616                        | 195                       | 636                        | 147                       |
| 4                    | 625                        | 59                        | 669                        | 339                       | 567                        | 435                       |
| 5                    | 590                        | 62                        | 718                        | 386                       | 578                        | 424                       |

**Table 1F : Minimum time required for Mc-2Ac to induce differentiation**

|                                            |     |     |     |     |     |
|--------------------------------------------|-----|-----|-----|-----|-----|
| Hours in the presence of Mc-2Ac (20 µg/ml) | 24  | 48  | 72  | 96  | 120 |
| Total number of cells counted              | 608 | 650 | 638 | 408 | 547 |
| Number of NBT positive cells               | 162 | 169 | 158 | 154 | 280 |
